# Supplementary material for: Metabolomic LC-MS/MS analyses and meta 16S rRNA gene analyses on cecal feces of Japanese rock ptarmigans reveal fundamental differences between semi-wild and captive raised individuals
Source: PubMed Central journal article supplement — J Vet Med Sci. 2020 Jun 23;82(8):1165–72. doi: 10.1292/jvms.20-0003 (PMC7468055; doi:10.1292/jvms.20-0003), 2020-06-23
Supplement: jvms-82-1165-s001.pdf [file jvms-82-1165-s001.pdf]

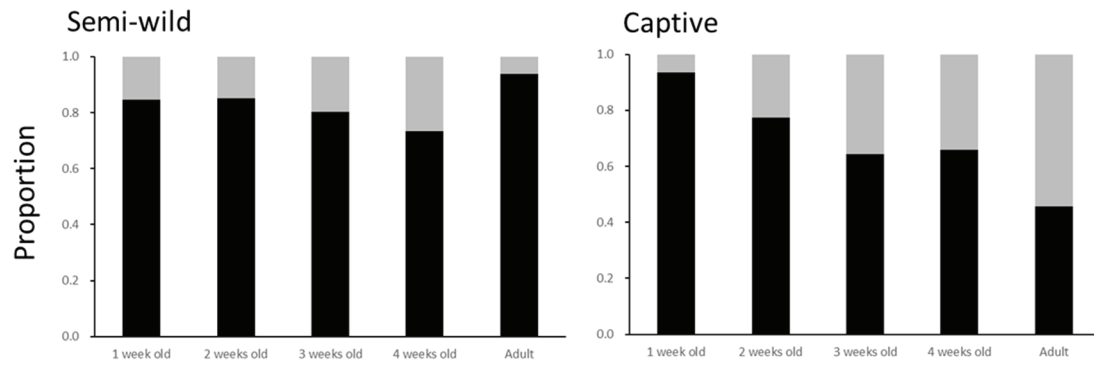

Supplementary Figure 1. The proportion of common OTUs at different ages of chicks and adult individuals. Black tile indicates the proportion of OTUs shared both by chicks and adult individuals.

Supplementary Table 1. The top 30 OTUs of adult microbiome in semi-wild (A) and captive (B) individuals and the change of the proportion in chicks from 1 week old to 4 weeks old.

**(A) Semi-wild individuals**

| No | O T U                                      | 1 week | 2 week | 3 week | 4 week | adult  |
|----|--------------------------------------------|--------|--------|--------|--------|--------|
| 1  | <i>Olsenella</i> sp. No1                   | 0.0637 | 0.1131 | 0.0994 | 0.0885 | 0.2286 |
| 2  | <i>Actinomyces</i> sp. No1                 | 0.1168 | 0.0914 | 0.0337 | 0.0403 | 0.0822 |
| 3  | <i>Shuttleworthia</i> sp. No1              | 0.0416 | 0.0300 | 0.0240 | 0.0516 | 0.0671 |
| 4  | Erysipelotrichaceae incertae sedis sp. No1 | 0.0231 | 0.0294 | 0.0568 | 0.0111 | 0.0468 |
| 5  | <i>Slackia</i> sp. No1                     | 0.0255 | 0.0545 | 0.0515 | 0.0454 | 0.0418 |
| 6  | <i>Megamonas</i> sp. No1                   | 0.0044 | 0.0076 | 0.0319 | 0.0306 | 0.0304 |
| 7  | <i>Robinsoniella</i> sp. No1               | 0.0051 | 0.0056 | 0.0074 | 0.0047 | 0.0297 |
| 8  | <i>Megasphaera</i> sp. No1                 | 0.0044 | 0.0044 | 0.0221 | 0.0203 | 0.0228 |
| 9  | <i>Bifidobacterium</i> sp. No1             | 0.0044 | 0.0065 | 0.0041 | 0.0059 | 0.0219 |
| 10 | <i>Cloacibacillus</i> sp. No1              | 0.0006 | 0.0004 | 0.0005 | 0.0015 | 0.0162 |
| 11 | <i>Eubacterium</i> sp. No1                 | 0.0111 | 0.0053 | 0.0068 | 0.0063 | 0.0151 |
| 12 | <i>Alkalibaculum</i> sp. No1               | 0.0126 | 0.0286 | 0.0127 | 0.0085 | 0.0144 |
| 13 | <i>Psychrosinus</i> sp. No1                | 0.0018 | 0.0049 | 0.0063 | 0.0018 | 0.0128 |
| 14 | <i>Adlercreutzia</i> sp. No1               | 0.0037 | 0.0078 | 0.0053 | 0.0034 | 0.0110 |
| 15 | <i>Anaerobacterium</i> sp. No1             | 0.0035 | 0.0043 | 0.0034 | 0.0029 | 0.0101 |
| 16 | <i>Asaccharobacter</i> sp. No1             | 0.0257 | 0.0264 | 0.0151 | 0.0136 | 0.0084 |
| 17 | <i>Allisonella</i> sp. No1                 | 0.0005 | 0.0004 | 0.0009 | 0.0010 | 0.0077 |
| 18 | <i>Guggenheimella</i> sp. No1              | 0.0007 | 0.0003 | 0.0005 | 0.0009 | 0.0070 |
| 19 | <i>Escherichia/Shigella</i> sp. No1        | 0.0011 | 0.0000 | 0.0040 | 0.0004 | 0.0067 |
| 20 | Lachnospiracea incertae sedis sp. No1      | 0.0142 | 0.0106 | 0.0084 | 0.0053 | 0.0065 |
| 21 | <i>Syntrophococcus</i> sp. No1             | 0.0026 | 0.0046 | 0.0030 | 0.0017 | 0.0059 |
| 22 | <i>Cloacibacillus</i> sp. No1              | 0.0002 | 0.0001 | 0.0000 | 0.0003 | 0.0058 |
| 23 | <i>Parvibacter</i> sp. No1                 | 0.0054 | 0.0081 | 0.0041 | 0.0038 | 0.0057 |
| 24 | <i>Defluviitalea</i> sp. No1               | 0.0030 | 0.0030 | 0.0023 | 0.0023 | 0.0057 |
| 25 | <i>Syntrophococcus</i> sp. No1             | 0.0023 | 0.0031 | 0.0027 | 0.0018 | 0.0056 |
| 26 | <i>Slackia</i> sp. No2                     | 0.0015 | 0.0045 | 0.0044 | 0.0042 | 0.0055 |
| 27 | <i>Flavonifractor</i> sp. No1              | 0.0064 | 0.0028 | 0.0206 | 0.0111 | 0.0046 |
| 28 | <i>Faecalitalea</i> sp. No1                | 0.0005 | 0.0005 | 0.0014 | 0.0007 | 0.0046 |
| 29 | <i>Butyricoccus</i> sp. No1                | 0.0014 | 0.0019 | 0.0027 | 0.0039 | 0.0041 |
| 30 | <i>Cloacibacillus</i> sp. No1              | 0.0002 | 0.0002 | 0.0001 | 0.0004 | 0.0038 |

**(B) Captive individuals**

| No | O T U                                 | 1 week | 2 week | 3week  | 4 week | Adult  |
|----|---------------------------------------|--------|--------|--------|--------|--------|
| 1  | <i>Escherichia/Shigella</i> sp. No1   | 0.0001 | 0.0509 | 0.0621 | 0.0740 | 0.0741 |
| 2  | <i>Ruminococcus2</i> sp. No1          | 0.1829 | 0.0718 | 0.0555 | 0.0736 | 0.0618 |
| 3  | <i>Ruminococcus2</i> sp. No2          | 0.0108 | 0.0625 | 0.0626 | 0.0610 | 0.0467 |
| 4  | <i>Fusicatenibacter</i> sp. No1       | 0.0001 | 0.0210 | 0.0307 | 0.0295 | 0.0383 |
| 5  | <i>Blautia</i> sp. No1                | 0.0000 | 0.0313 | 0.0187 | 0.0176 | 0.0282 |
| 6  | <i>Ruminococcus2</i> sp. No3          | 0.0204 | 0.0332 | 0.0289 | 0.0309 | 0.0264 |
| 7  | <i>Ruminococcus2</i> sp. No4          | 0.0456 | 0.0444 | 0.0436 | 0.0356 | 0.0247 |
| 8  | <i>Citrobacter</i> sp. No1            | 0.0007 | 0.0504 | 0.0314 | 0.0217 | 0.0245 |
| 9  | <i>Clostridium</i> XIVa sp. No1       | 0.0000 | 0.0001 | 0.0016 | 0.0021 | 0.0227 |
| 10 | <i>Klebsiella</i> sp. No1             | 0.2441 | 0.1893 | 0.0455 | 0.0685 | 0.0135 |
| 11 | <i>Flavonifractor</i> sp. No1         | 0.0002 | 0.0040 | 0.0110 | 0.0087 | 0.0123 |
| 12 | <i>Clostridium</i> XIVa sp. No2       | 0.0000 | 0.0043 | 0.0075 | 0.0091 | 0.0122 |
| 13 | <i>Acetitomaculum</i> sp. No1         | 0.0000 | 0.0099 | 0.0101 | 0.0161 | 0.0118 |
| 14 | <i>Clostridium</i> XIVa sp. No3       | 0.0000 | 0.0000 | 0.0000 | 0.0000 | 0.0087 |
| 15 | <i>Coprococcus</i> sp. No1            | 0.0001 | 0.0034 | 0.0048 | 0.0059 | 0.0086 |
| 16 | <i>Ruminococcus 2</i> sp. No5         | 0.0000 | 0.0000 | 0.0011 | 0.0012 | 0.0084 |
| 17 | <i>Blautia</i> sp. No2                | 0.0000 | 0.0000 | 0.0000 | 0.0000 | 0.0072 |
| 18 | <i>Blautia</i> sp. No3                | 0.2625 | 0.0354 | 0.0351 | 0.0348 | 0.0072 |
| 19 | <i>Ruminococcus 2</i> sp. No6         | 0.0000 | 0.0001 | 0.0025 | 0.0089 | 0.0068 |
| 20 | <i>Fusicatenibacter</i> sp. No1       | 0.0000 | 0.0000 | 0.0000 | 0.0000 | 0.0067 |
| 21 | <i>Gemmiger</i> sp. No1               | 0.0001 | 0.0250 | 0.0255 | 0.0261 | 0.0063 |
| 22 | <i>Anaerobacterium</i> sp. No1        | 0.0000 | 0.0000 | 0.0000 | 0.0000 | 0.0062 |
| 23 | <i>Coprobacillus</i> sp. No1          | 0.0000 | 0.0000 | 0.0000 | 0.0000 | 0.0060 |
| 24 | Lachnospiracea incertae sedis sp. No1 | 0.0000 | 0.0002 | 0.0073 | 0.0068 | 0.0056 |
| 25 | <i>Ruminococcus2</i> sp. No6          | 0.0049 | 0.0069 | 0.0062 | 0.0065 | 0.0054 |
| 26 | <i>Ruminococcus2</i> sp. No7          | 0.0000 | 0.0002 | 0.0024 | 0.0036 | 0.0053 |
| 27 | <i>Clostridium</i> XIVa sp. No4       | 0.0000 | 0.0003 | 0.0050 | 0.0049 | 0.0049 |
| 28 | <i>Faecalibacterium</i> sp. No1       | 0.0000 | 0.0011 | 0.0012 | 0.0011 | 0.0044 |
| 29 | Lachnospiracea incertae sedis sp. No2 | 0.0000 | 0.0000 | 0.0001 | 0.0068 | 0.0044 |
| 30 | <i>Coprococcus</i> sp. No1            | 0.0000 | 0.0000 | 0.0000 | 0.0026 | 0.0043 |

Top 30 OTUs are listed for Adult individuals (the rightest columns). The detection rates of these OTUs in chicks of different ages (from One week old to 4 weeks old) are shown. The darker colors indicate bigger prevalence.

Supplementary Table 2. The prevalence of genera in the cecal microbiome of semi-wild Japanese rock ptarmigan at different age.

| Genus                 |                                    | 1 week old    | 2 weeks old   | 3 weeks old   | 4 weeks old   | Adult         |
|-----------------------|------------------------------------|---------------|---------------|---------------|---------------|---------------|
| <b>Actinobacteria</b> |                                    |               |               |               |               |               |
| 1                     | <i>Olsenella</i>                   | 0.0734        | 0.1317        | 0.1166        | 0.1049        | 0.2595        |
| 2                     | <i>Actinomyces</i>                 | 0.1214        | 0.0949        | 0.0361        | 0.0433        | 0.0869        |
| 3                     | <i>Slackia</i>                     | 0.0335        | 0.0709        | 0.0640        | 0.0581        | 0.0564        |
| 7                     | <i>Bifidobacterium</i>             | 0.0045        | 0.0067        | 0.0043        | 0.0062        | 0.0228        |
| 5                     | <i>Parvibacter</i>                 | 0.0087        | 0.0173        | 0.0076        | 0.0082        | 0.0145        |
| 6                     | <i>Adlercreutzia</i>               | 0.0068        | 0.0120        | 0.0095        | 0.0065        | 0.0136        |
| 4                     | <i>Asaccharobacter</i>             | 0.0276        | 0.0289        | 0.0166        | 0.0150        | 0.0093        |
| 8                     | <i>Dermabacter</i>                 | 0.0058        | 0.0060        | 0.0029        | 0.0037        | 0.0068        |
| 9                     | <i>Eggerthella</i>                 | 0.0010        | 0.0023        | 0.0021        | 0.0021        | 0.0020        |
| 10                    | <i>Coriobacterium</i>              | 0.0003        | 0.0009        | 0.0006        | 0.0005        | 0.0013        |
| 11                    | Other 41 genera                    | 0.0022        | 0.0027        | 0.0018        | 0.0028        | 0.0053        |
|                       | <b>Sub total</b>                   | <b>0.2854</b> | <b>0.3744</b> | <b>0.2619</b> | <b>0.2512</b> | <b>0.4785</b> |
| <b>Bacteroidetes</b>  |                                    |               |               |               |               |               |
| 1                     | <i>Paraprevotella</i>              | 0.0004        | 0.0007        | 0.0008        | 0.0083        | 0.0021        |
| 2                     | <i>Anaerorhabdus</i>               | 0.0010        | 0.0010        | 0.0005        | 0.0010        | 0.0035        |
| 3                     | <i>Phocaeicola</i>                 | 0.0003        | 0.0005        | 0.0004        | 0.0017        | 0.0006        |
| 4                     | <i>Bacteroides</i>                 | 0.0001        | 0.0000        | 0.0003        | 0.0014        | 0.0006        |
| 5                     | <i>Macellibacteroides</i>          | 0.0001        | 0.0001        | 0.0001        | 0.0005        | 0.0006        |
| 6                     | Other 24 genera                    | 0.0001        | 0.0000        | 0.0002        | 0.0022        | 0.0018        |
|                       | <b>Sub total</b>                   | <b>0.0020</b> | <b>0.0024</b> | <b>0.0022</b> | <b>0.0151</b> | <b>0.0092</b> |
| <b>Firmicutes</b>     |                                    |               |               |               |               |               |
|                       |                                    | a             | b             | c             | d             | e             |
| 1                     | <i>Shuttleworthia</i>              | 0.0466        | 0.0354        | 0.0289        | 0.0604        | 0.0799        |
| 2                     | Erysipelotrichaceae_incertae_sedis | 0.0260        | 0.0317        | 0.0619        | 0.0127        | 0.0521        |
| 3                     | <i>Megamonas</i>                   | 0.0055        | 0.0098        | 0.0411        | 0.0410        | 0.0405        |
| 4                     | <i>Robinsoniella</i>               | 0.0087        | 0.0116        | 0.0102        | 0.0071        | 0.0357        |
| 5                     | <i>Megasphaera</i>                 | 0.0044        | 0.0044        | 0.0224        | 0.0203        | 0.0233        |
| 6                     | <i>Ruminococcus 2</i>              | 0.2733        | 0.1618        | 0.1504        | 0.1602        | 0.0221        |
| 7                     | <i>Eubacterium</i>                 | 0.0122        | 0.0058        | 0.0074        | 0.0069        | 0.0171        |
| 8                     | Lachnospiraceae_incertae_sedis     | 0.0591        | 0.0531        | 0.0518        | 0.0548        | 0.0170        |
| 9                     | <i>Alkalibaculum</i>               | 0.0141        | 0.0317        | 0.0141        | 0.0095        | 0.0167        |
| 10                    | <i>Syntrophococcus</i>             | 0.0075        | 0.0106        | 0.0080        | 0.0062        | 0.0163        |
| 11                    | <i>Anaerobacterium</i>             | 0.0081        | 0.0104        | 0.0113        | 0.0061        | 0.0158        |
| 12                    | <i>Flavonifractor</i>              | 0.0245        | 0.0398        | 0.0724        | 0.0258        | 0.0092        |
| 13                    | <i>Coprococcus</i>                 | 0.0346        | 0.0352        | 0.0472        | 0.0667        | 0.0049        |
| 14                    | <i>Clostridium IV</i>              | 0.0083        | 0.0095        | 0.0130        | 0.0107        | 0.0029        |
| 15                    | <i>Clostridium XIVa</i>            | 0.0284        | 0.0214        | 0.0399        | 0.0552        | 0.0022        |
| 16                    | <i>Clostridium XVIII</i>           | 0.0207        | 0.0229        | 0.0067        | 0.0030        | 0.0018        |
| 17                    | <i>Murimonas</i>                   | 0.0069        | 0.0074        | 0.0058        | 0.0047        | 0.0016        |
| 18                    | <i>Anaerosporeobacter</i>          | 0.0045        | 0.0039        | 0.0107        | 0.0066        | 0.0015        |
| 19                    | <i>Dorea</i>                       | 0.0215        | 0.0244        | 0.0149        | 0.0157        | 0.0014        |
| 20                    | <i>Blautia</i>                     | 0.0238        | 0.0201        | 0.0024        | 0.0033        | 0.0001        |
| 21                    | Other 121 genera                   | 0.0703        | 0.0705        | 0.0758        | 0.0801        | 0.0992        |
|                       | <b>Sub total</b>                   | <b>0.7090</b> | <b>0.6215</b> | <b>0.6962</b> | <b>0.6569</b> | <b>0.4613</b> |
| <b>Proteobacteria</b> |                                    |               |               |               |               |               |
| 1                     | <i>Raoultella</i>                  | 0.0000        | 0.0000        | 0.0068        | 0.0509        | 0.0002        |
| 2                     | <i>Providencia</i>                 | 0.0000        | 0.0000        | 0.0229        | 0.0099        | 0.0000        |
| 3                     | <i>Escherichia/Shigella</i>        | 0.0012        | 0.0000        | 0.0045        | 0.0005        | 0.0089        |
| 4                     | <i>Buttiauxella</i>                | 0.0000        | 0.0000        | 0.0005        | 0.0039        | 0.0000        |
| 5                     | <i>Hafnia</i>                      | 0.0000        | 0.0000        | 0.0020        | 0.0001        | 0.0040        |
| 6                     | <i>Bilophila</i>                   | 0.0007        | 0.0004        | 0.0003        | 0.0016        | 0.0008        |
| 7                     | <i>Citrobacter</i>                 | 0.0000        | 0.0000        | 0.0001        | 0.0021        | 0.0000        |
| 8                     | <i>Leclercia</i>                   | 0.0000        | 0.0000        | 0.0002        | 0.0012        | 0.0000        |
| 9                     | <i>Helicobacter</i>                | 0.0001        | 0.0001        | 0.0001        | 0.0006        | 0.0010        |
| 10                    | <i>Kluyvera</i>                    | 0.0000        | 0.0000        | 0.0000        | 0.0003        | 0.0012        |
| 11                    | Other 49 genera                    | 0.0003        | 0.0001        | 0.0006        | 0.0016        | 0.0010        |
|                       | <b>Sub total</b>                   | <b>0.0022</b> | <b>0.0006</b> | <b>0.0380</b> | <b>0.0725</b> | <b>0.0172</b> |
| <b>Spirochaetes</b>   |                                    |               |               |               |               |               |
| 1                     | <i>Sphaerochaeta</i>               | 0.0000        | 0.0000        | 0.0000        | 0.0001        | 0.0000        |
| 2                     | <i>Treponema</i>                   | 0.0000        | 0.0000        | 0.0000        | 0.0004        | 0.0001        |
|                       | <b>Sub total</b>                   | <b>0.0000</b> | <b>0.0000</b> | <b>0.0000</b> | <b>0.0005</b> | <b>0.0001</b> |
| <b>Synergistetes</b>  |                                    |               |               |               |               |               |
| 1                     | <i>Cloacibacillus</i>              | 0.0011        | 0.0007        | 0.0006        | 0.0027        | 0.0320        |
| 2                     | <i>Lactivibrio</i>                 | 0.0002        | 0.0002        | 0.0001        | 0.0002        | 0.0000        |
| 3                     | <i>Aminiphilus</i>                 | 0.0000        | 0.0000        | 0.0000        | 0.0001        | 0.0007        |
| 4                     | <i>Jonquetella</i>                 | 0.0000        | 0.0000        | 0.0000        | 0.0000        | 0.0004        |
| 5                     | <i>Synergistes</i>                 | 0.0000        | 0.0000        | 0.0000        | 0.0000        | 0.0003        |
| 6                     | <i>Aminomonas</i>                  | 0.0000        | 0.0000        | 0.0000        | 0.0000        | 0.0003        |
|                       | <b>Sub total</b>                   | <b>0.0013</b> | <b>0.0008</b> | <b>0.0007</b> | <b>0.0030</b> | <b>0.0337</b> |
| <b>Other 11 phyla</b> |                                    |               |               |               |               |               |
| 1                     | 16 genera                          | 0.0001        | 0.0002        | 0.0010        | 0.0007        | 0.0001        |

The darker color means higher proportion in the age.

Supplementary Table 3. The prevalence of genera in the cecal microbiome of captive Japanese rock ptarmigan at different age.

|                                  | Genus                                | 1 week old    | 2 weeks old   | 3 weeks old   | 4 weeks old   | Adult         |
|----------------------------------|--------------------------------------|---------------|---------------|---------------|---------------|---------------|
| <b>Actinobacteria</b>            |                                      |               |               |               |               |               |
| 1                                | <i>Slackia</i>                       | 0.0003        | 0.0000        | 0.0000        | 0.0000        | 0.0001        |
| 2                                | <i>Eggerthella</i>                   | 0.0004        | 0.0000        | 0.0000        | 0.0000        | 0.0000        |
| 3                                | <i>Enterorhabdus</i>                 | 0.0000        | 0.0000        | 0.0000        | 0.0000        | 0.0001        |
| 4                                | <i>Bacteroidetes</i>                 | 0.0000        | 0.0000        | 0.0000        | 0.0000        | 0.0000        |
| 5                                | <i>Olsenella</i>                     | 0.0000        | 0.0000        | 0.0000        | 0.0000        | 0.0000        |
| 6                                | <i>Parvibacter</i>                   | 0.0000        | 0.0000        | 0.0000        | 0.0000        | 0.0000        |
|                                  | <b>Sub total</b>                     | <b>0.0007</b> | <b>0.0001</b> | <b>0.0000</b> | <b>0.0000</b> | <b>0.0002</b> |
| <b>Bacteroidetes</b>             |                                      |               |               |               |               |               |
| 1                                | <i>Barnesiella</i>                   | 0.0000        | 0.0000        | 0.0000        | 0.0000        | 0.0000        |
| 2                                | <i>Anaerorhabdus</i>                 | 0.0000        | 0.0000        | 0.0000        | 0.0000        | 0.0000        |
| 3                                | <i>Macellibacteroides</i>            | 0.0000        | 0.0000        | 0.0000        | 0.0000        | 0.0000        |
|                                  | <b>Sub total</b>                     | <b>0.0000</b> | <b>0.0000</b> | <b>0.0000</b> | <b>0.0000</b> | <b>0.0000</b> |
| <b>Cyanobacteria/Chloroplast</b> |                                      |               |               |               |               |               |
| 1                                | <i>Streptophyta</i>                  | 0.0437        | 0.0085        | 0.0013        | 0.0000        | 0.0000        |
| <b>Firmicutes</b>                |                                      |               |               |               |               |               |
| 1                                | <i>Ruminococcus 2</i>                | 0.2922        | 0.2925        | 0.3132        | 0.3118        | 0.2772        |
| 2                                | <i>Clostridium XIVa</i>              | 0.0364        | 0.0661        | 0.0827        | 0.0799        | 0.1121        |
| 3                                | <i>Coprococcus</i>                   | 0.0617        | 0.0490        | 0.0692        | 0.0698        | 0.0686        |
| 4                                | <i>Fusicatenibacter</i>              | 0.0004        | 0.0222        | 0.0411        | 0.0387        | 0.0596        |
| 5                                | <i>Blautia</i>                       | 0.2687        | 0.0708        | 0.0919        | 0.0632        | 0.0555        |
| 6                                | <i>Lachnospiracea_incertae_sedis</i> | 0.0002        | 0.0112        | 0.0247        | 0.0333        | 0.0304        |
| 7                                | <i>Flavonifractor</i>                | 0.0038        | 0.0111        | 0.0223        | 0.0174        | 0.0279        |
| 8                                | <i>Anaerobacterium</i>               | 0.0000        | 0.0048        | 0.0049        | 0.0049        | 0.0188        |
| 9                                | <i>Acetitomaculum</i>                | 0.0000        | 0.0106        | 0.0112        | 0.0177        | 0.0132        |
| 10                               | <i>Eisenbergiella</i>                | 0.0000        | 0.0024        | 0.0032        | 0.0063        | 0.0128        |
| 11                               | <i>Clostridium IV</i>                | 0.0000        | 0.0004        | 0.0025        | 0.0056        | 0.0129        |
| 12                               | <i>Robinsoniella</i>                 | 0.0001        | 0.0017        | 0.0039        | 0.0032        | 0.0126        |
| 13                               | <i>Clostridium XVIII</i>             | 0.0106        | 0.0281        | 0.0398        | 0.0300        | 0.0090        |
| 14                               | <i>Gemmiger</i>                      | 0.0002        | 0.0331        | 0.0339        | 0.0351        | 0.0078        |
| 15                               | <i>Subdoligranulum</i>               | 0.0000        | 0.0060        | 0.0307        | 0.0227        | 0.0094        |
| 16                               | <i>Lachnospira</i>                   | 0.0000        | 0.0100        | 0.0161        | 0.0093        | 0.0057        |
| 17                               | <i>Dorea</i>                         | 0.0001        | 0.0052        | 0.0130        | 0.0126        | 0.0083        |
| 18                               | <i>Anaerostipes</i>                  | 0.0000        | 0.0031        | 0.0041        | 0.0066        | 0.0056        |
| 19                               | <i>Pseudoflavonifractor</i>          | 0.0000        | 0.0023        | 0.0030        | 0.0049        | 0.0082        |
| 20                               | <i>Butyricicoccus</i>                | 0.0000        | 0.0019        | 0.0023        | 0.0031        | 0.0085        |
| 21                               | Other 155 genera                     | 0.0079        | 0.0234        | 0.0261        | 0.0255        | 0.0954        |
|                                  | <b>Sub total</b>                     | <b>0.6824</b> | <b>0.6560</b> | <b>0.8399</b> | <b>0.8017</b> | <b>0.8597</b> |
| <b>Proteobacteria</b>            |                                      |               |               |               |               |               |
| 1                                | <i>Klebsiella</i>                    | 0.2481        | 0.1947        | 0.0472        | 0.0703        | 0.0141        |
| 2                                | <i>Escherichia/Shigella</i>          | 0.0001        | 0.0638        | 0.0693        | 0.0922        | 0.0860        |
| 3                                | <i>Citrobacter</i>                   | 0.0070        | 0.0561        | 0.0343        | 0.0265        | 0.0273        |
| 6                                | <i>Kluyvera</i>                      | 0.0000        | 0.0005        | 0.0004        | 0.0012        | 0.0052        |
| 4                                | <i>Enterobacter</i>                  | 0.0111        | 0.0091        | 0.0026        | 0.0029        | 0.0021        |
| 7                                | <i>Pseudocitrobacter</i>             | 0.0000        | 0.0011        | 0.0014        | 0.0017        | 0.0018        |
| 5                                | <i>Leclercia</i>                     | 0.0045        | 0.0032        | 0.0014        | 0.0015        | 0.0004        |
| 8                                | <i>Trabulsiella</i>                  | 0.0010        | 0.0015        | 0.0009        | 0.0010        | 0.0005        |
| 9                                | <i>Pantoea</i>                       | 0.0001        | 0.0035        | 0.0002        | 0.0001        | 0.0005        |
| 10                               | <i>Salmonella</i>                    | 0.0013        | 0.0012        | 0.0005        | 0.0004        | 0.0008        |
| 11                               | <i>Raoultella</i>                    | 0.0000        | 0.0001        | 0.0001        | 0.0001        | 0.0004        |
| 12                               | Other 25 genera                      | 0.0000        | 0.0007        | 0.0005        | 0.0004        | 0.0010        |
|                                  | <b>Sub total</b>                     | <b>0.2732</b> | <b>0.3355</b> | <b>0.1588</b> | <b>0.1983</b> | <b>0.1401</b> |

The darker color means higher proportion in the age.
